# Supplementary material for: Analytical validation of a Biochip prototype for integrated analysis of AFP-IgM and SCCA-IgM serum biomarkers in patients with liver cirrhosis and hepatocellular carcinoma
Source: Royal Society of Chemistry journal article supplement (doi:10.1039/c4ay02495h), 2014-11-24

### Supplementary Figure 1.

The flowchart shows the analytical steps of the optimized protocol for CompleXima HCC Biochip analysis.

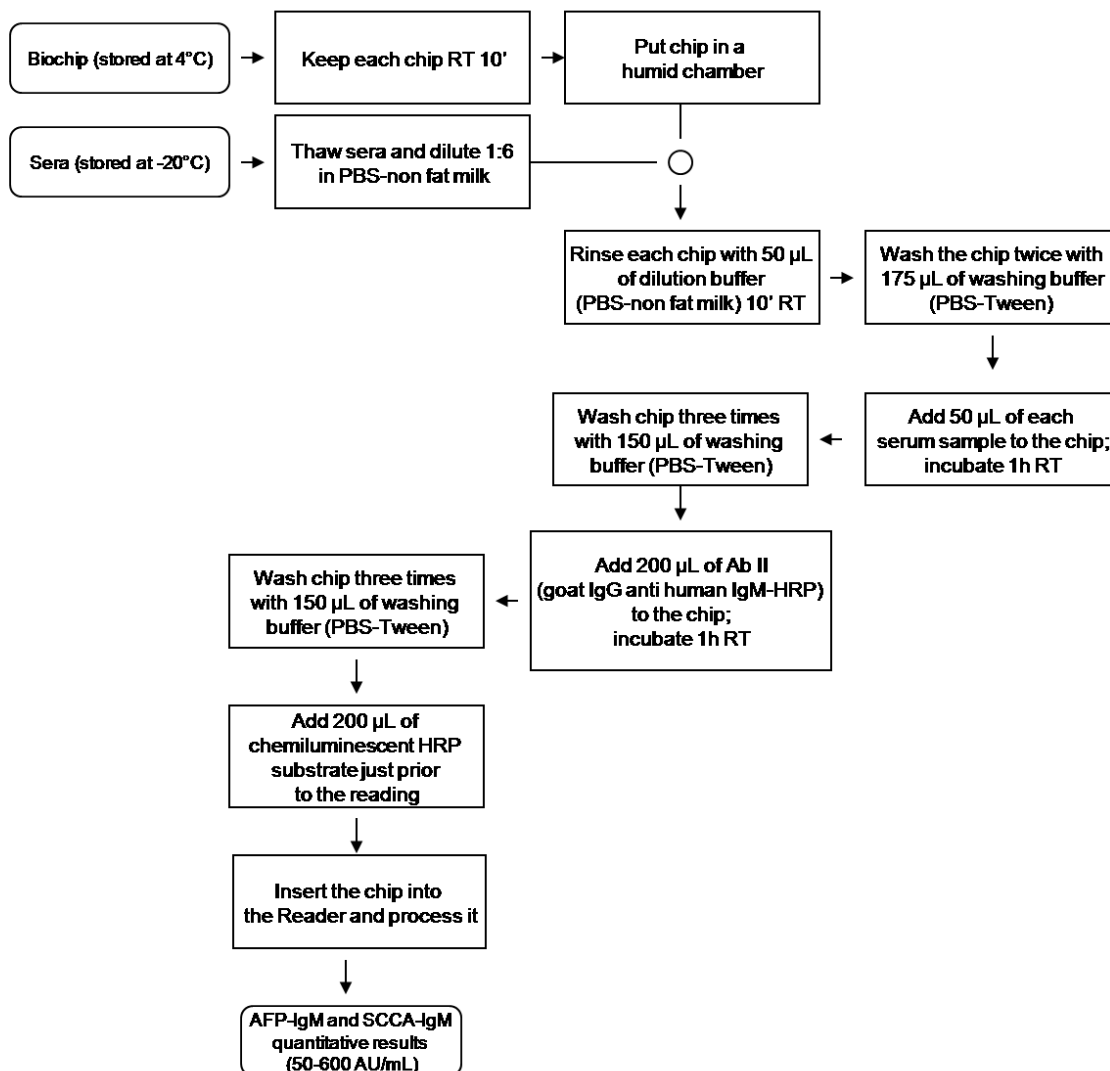

Supplement: c4ay02495h1.pdf [file c4ay02495h1.pdf]
